# Supplementary material for: Bioleaching of Chalcopyrite by a New Strain Leptospirillum ferrodiazotrophum Ksh-L Isolated from a Dump-Bioleaching System of Kashen Copper-Molybdenum Mine
Source: MDPI journal article supplement (doi:10.3390/min14010026), 2023-12-25
Supplement: s1 [file s1]

# Bioleaching of Chalcopyrite by a New Strain *Leptospirillum ferrodiazotrophum* Ksh-L Isolated from a Dump-Bioleaching System of Kashen Copper-Molybdenum Mine

Anna Khachatryan <sup>1</sup>, Narine Vardanyan <sup>1</sup>, Sabine Willscher <sup>2</sup>, Garegin Sevoyan <sup>3</sup>, Ruiyong Zhang <sup>4,\*</sup> and Arevik Vardanyan <sup>1,\*</sup>

<sup>1</sup> Laboratory of Metals Bioleaching, Institute of Microbiology, SPC “Armbiotechnology” NAS of Armenia, 14 Gyurjyan str., Yerevan 0056, Armenia; anna.khachatryan@asnet.am (A.K.); nvard@sci.am (N.V.)

<sup>2</sup> Faculty of Natural Sciences I, Martin-Luther-Universität Halle-Wittenberg, Hoher Weg 8, 06120 Halle, Germany; sabine.willscher@gmail.com

<sup>3</sup> Department of Ecology, Faculty of Biology, Yerevan State University, 1 Alex Manoogian str., Yerevan 0025, Armenia; armbiosevovyan@yahoo.com

<sup>4</sup> Key Laboratory of Marine Environmental Corrosion and Biofouling, Institute of Oceanology, Chinese Academy of Sciences, No. 7 Nanhai Road, Qingdao 266071, China

\* Correspondence: ruiyong.zhang@qdio.ac.cn (R.Z.); arevik.vardanyan@asnet.am (A.V.); Tel.: +86-13210842959 (R.Z.); +374-94900931 (A.V.)

**Citation:** Khachatryan, A.; Vardanyan, N.; Willscher, S.; Sevoyan, G.; Zhang, R.; Vardanyan, A. Bioleaching of Chalcopyrite by a New Strain *Leptospirillum ferrodiazotrophum* Ksh-L Isolated from a Dump-Bioleaching System of Kashen Copper-Molybdenum Mine. *Minerals* **2024**, *14*, 26. <https://doi.org/10.3390/min14010026>

Academic Editor: Naoko Okibe, Elizabeth Watkin

Received: 18 October 2023

Revised: 14 December 2023

Accepted: 22 December 2023

Published: 25 December 2023

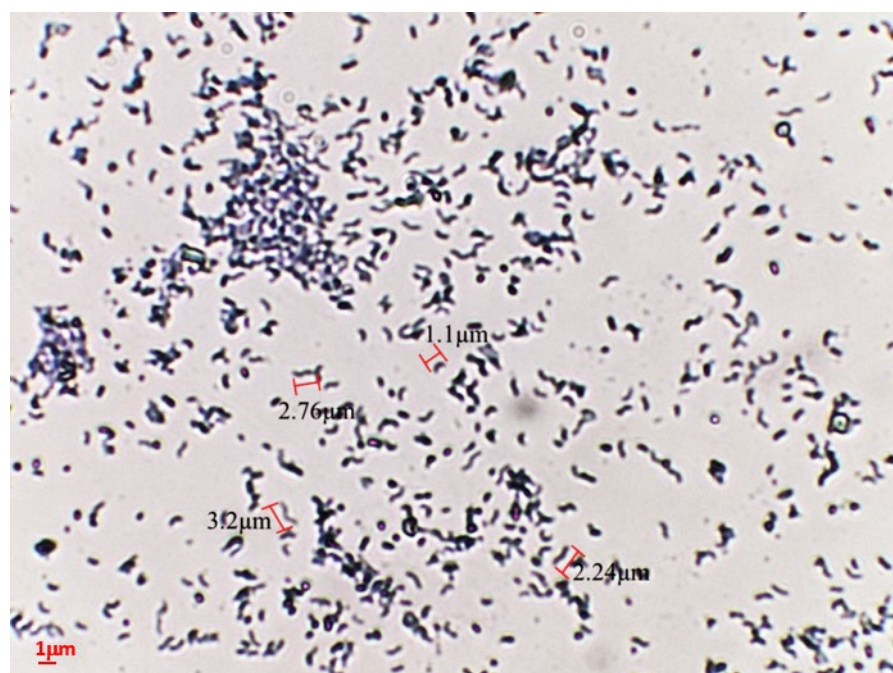

**Figure S1.** Microphotography of iron oxidized bacteria (Motic BA 310 trinocular (×1000) microscope with Digital Camera Moticam A16 (× 0.5).

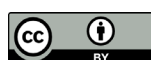

**Copyright:** © 2023 by the author. Licensee MDPI, Basel, Switzerland. This article is an open access article distributed under the terms and conditions of the Creative Commons Attribution (CC BY) license (<https://creativecommons.org/licenses/by/4.0/>).

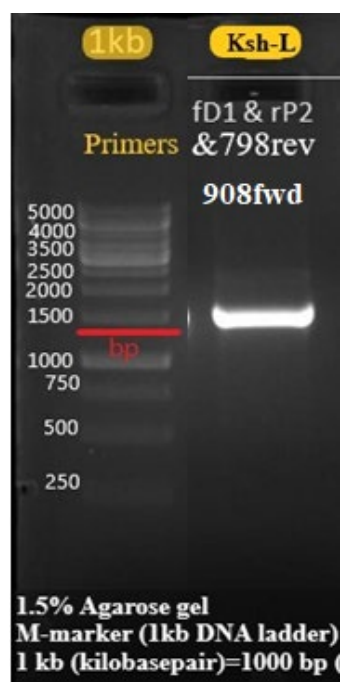

**Figure S2.** Gel electrophoresis of PCR amplification of 16S rRNA amplified product of 16S rDNA for bacterial isolate *Leptospirillum* sp. Ksh-L.

**Disclaimer/Publisher's Note:** The statements, opinions and data contained in all publications are solely those of the individual author(s) and contributor(s) and not of MDPI and/or the editor(s). MDPI and/or the editor(s) disclaim responsibility for any injury to people or property resulting from any ideas, methods, instructions or products referred to in the content.
